# Supplementary material for: Ceria nanomaterials containing ytterbium: low and high concentration – luminescence analyzed in the near infrared region
Source: Royal Society of Chemistry journal article supplement (doi:10.1039/d3ra06868d), 2023-01-01
Supplement: d3ra06868d1.pdf [file d3ra06868d1.pdf]

## Supporting information

Ceria Nanomaterials Containing Ytterbium: Low and High Concentration - Luminescence Analyzed in the Near Infrared Region

Sitshengisiwe Chemura<sup>a</sup>, Tim Schruppf<sup>a</sup>, Christina Günter<sup>b</sup>, Michael U. Kumke<sup>a\*</sup>

<sup>a</sup>Institute of Chemistry (Optical Sensing and Spectroscopy), University of Potsdam, Karl-Liebknecht-Str. 24-25, 14476 Potsdam, Germany

<sup>b</sup>Institute for Earth Sciences, University of Potsdam, Karl-Liebknecht-Str. 24-25, 14476 Potsdam, Germany

\*Email: kumke@uni-potsdam.de

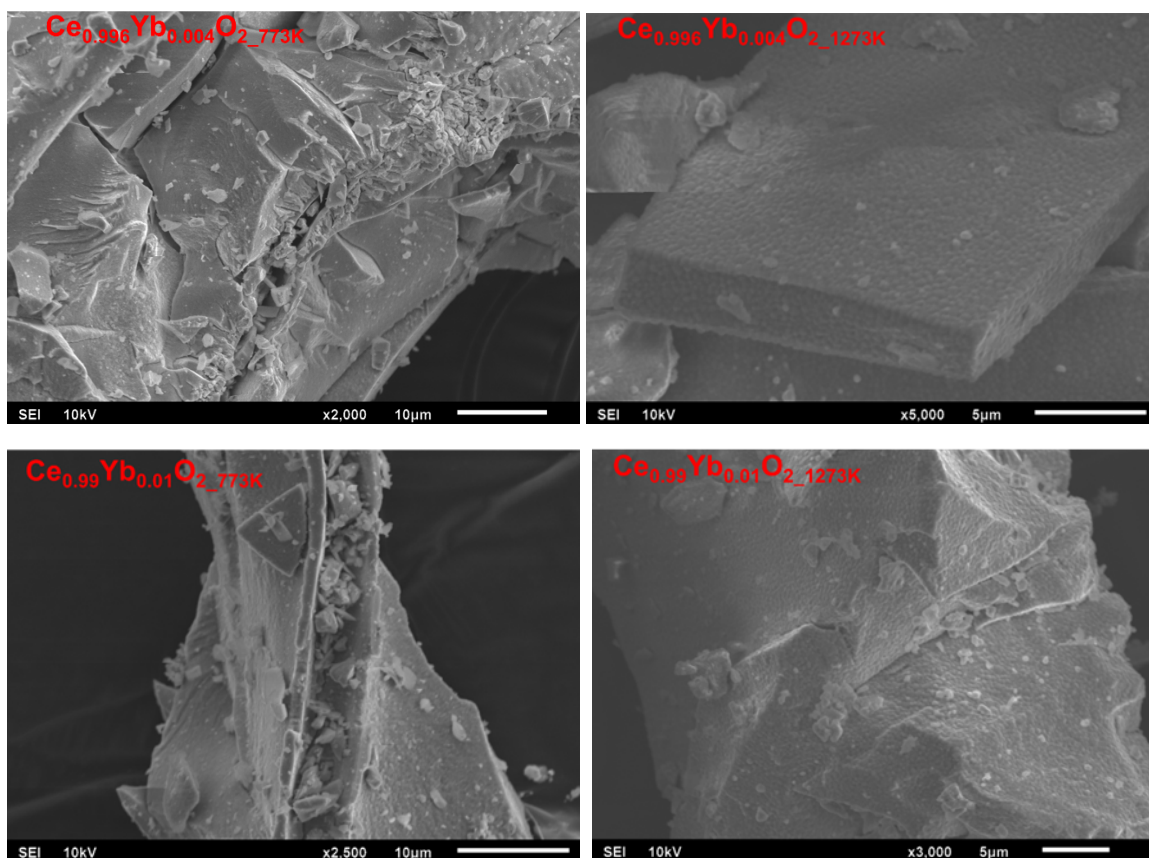

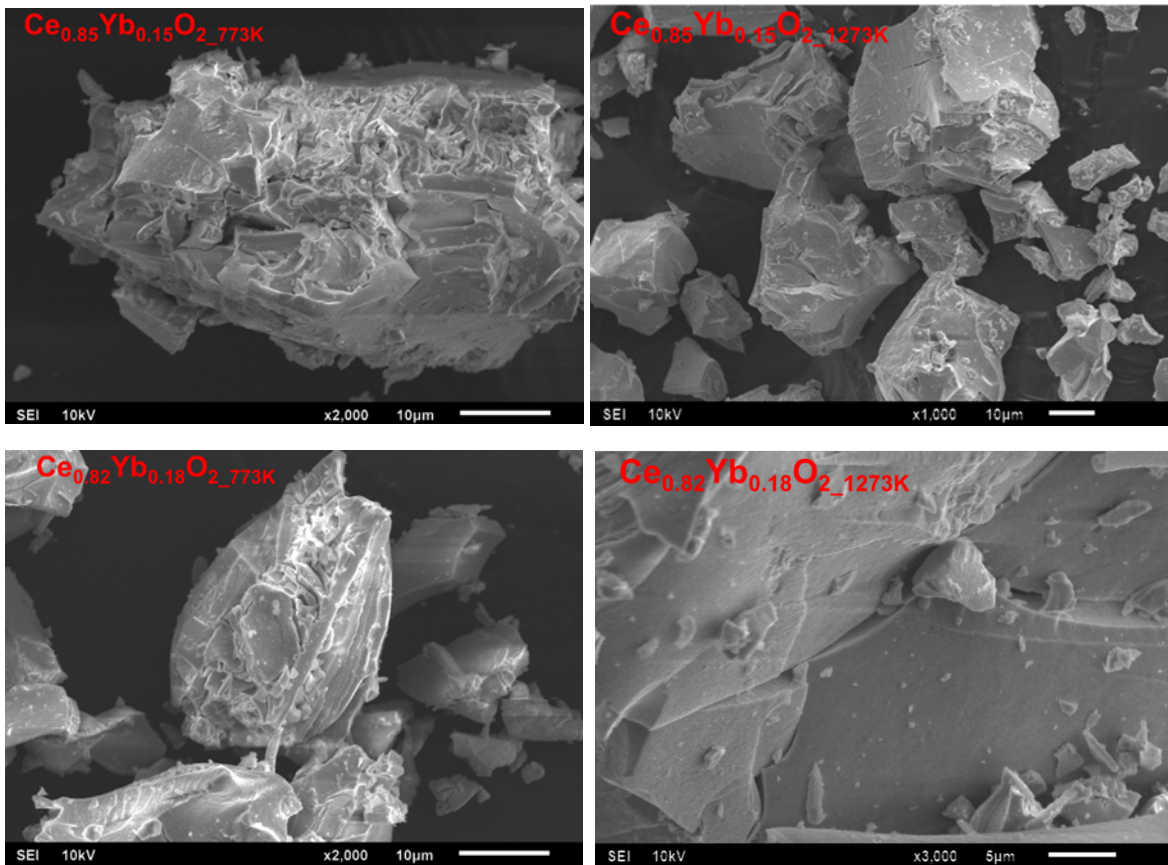

Fig. S11. SEM micrographs of  $Ce_{1-x}Yb_xO_2$  powders calcined at 773 K (left column) and 1273 K (right column).

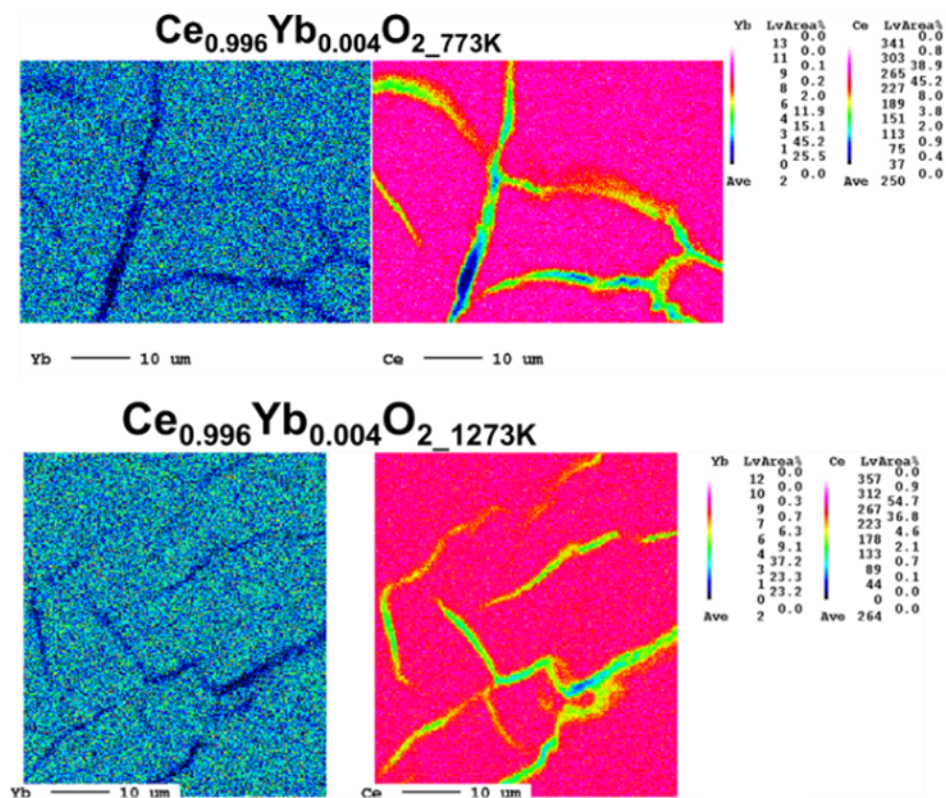

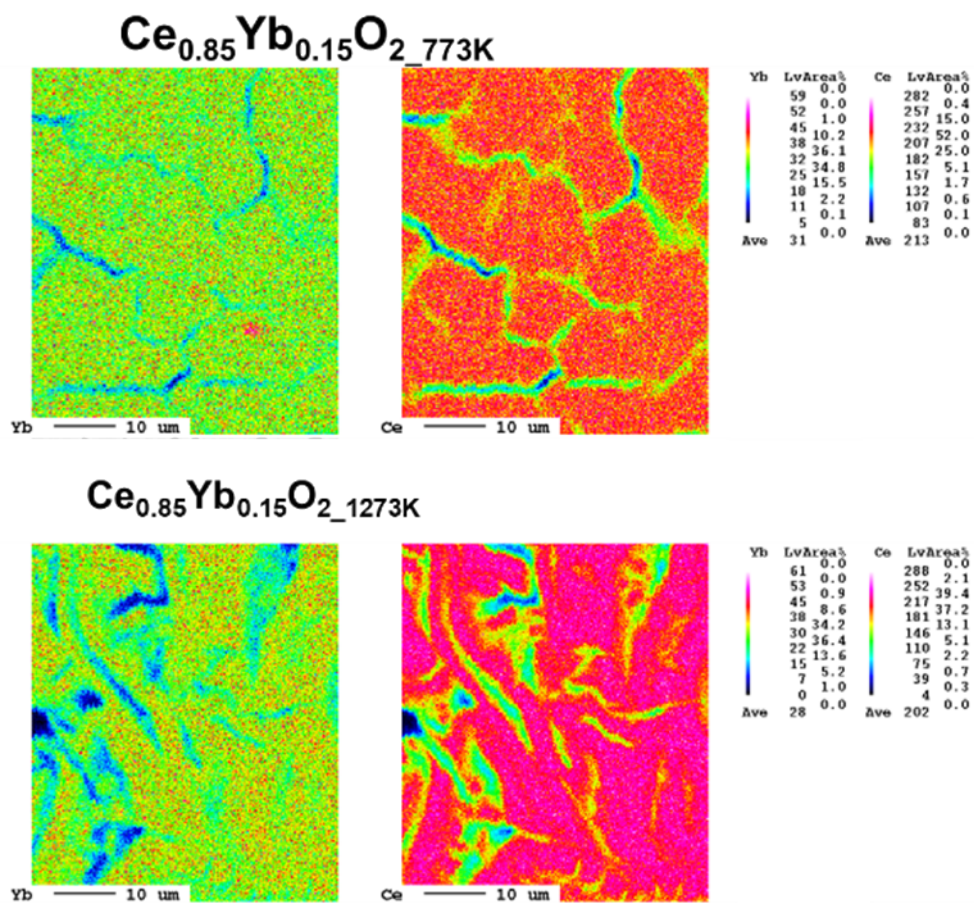

**Fig. S/2.** Elemental maps for Ce<sub>0.996</sub>Yb<sub>0.004</sub>O<sub>2</sub> and Ce<sub>0.85</sub>Yb<sub>0.15</sub>O<sub>2</sub> nanomaterials annealed at 773 K and 1273 K for 2 h.

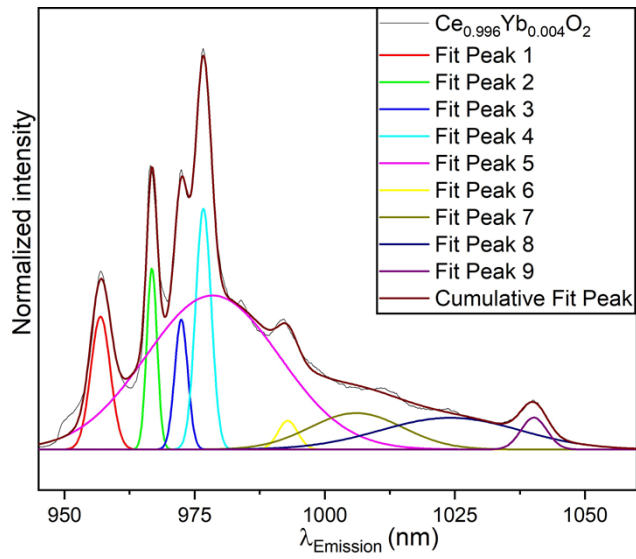

**Fig. S13** Gauss fit for  $\text{Ce}_{0.996}\text{Yb}_{0.004}\text{O}_2$

**Table S11** Parameters from the Gauss fit for  $\text{Ce}_{0.996}\text{Yb}_{0.004}\text{O}_2$

| Peak position | FWHM (nm)  | Normalized intensity |
|---------------|------------|----------------------|
| 956,92±0,02   | 4,41±0,06  | 0,33±0               |
| 966,79±0,02   | 2,32±0,03  | 0,45±0,01            |
| 972,42±0,03   | 2,95±0,07  | 0,32±0,01            |
| 976,68±0,02   | 3,53±0,04  | 0,60±0               |
| 978,46±0,26   | 30,20±0,54 | 0,38±0               |
| 992,89±0,11   | 4,45±0,32  | 0,07±0               |
| 1006,06±1,026 | 20,97±2,95 | 0,09±0,03            |
| 1024,12±4,52  | 31,57±4,39 | 0,08±0,01            |
| 1040,17±0,11  | 5,87±0,32  | 0,08±0               |

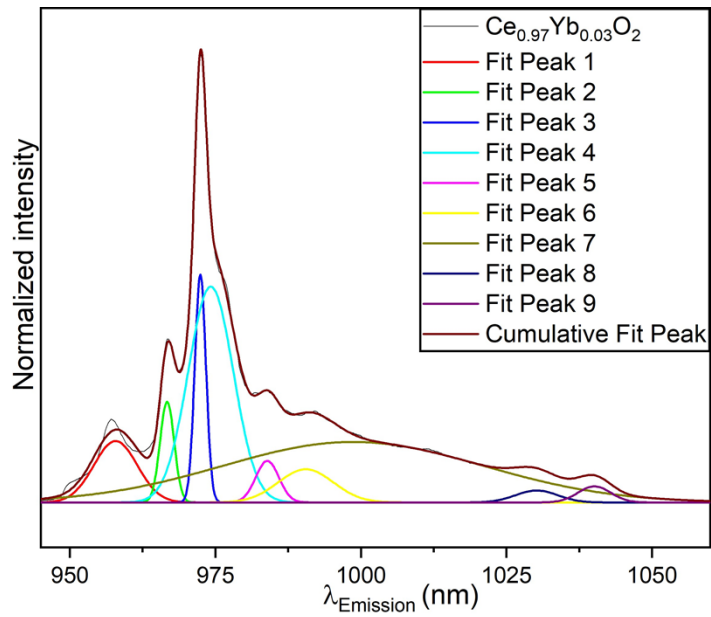

**Fig. S14** Gauss fit for  $\text{Ce}_{0.97}\text{Yb}_{0.03}\text{O}_2$

**Table S12** Parameters from the Gauss fit for  $\text{Ce}_{0.97}\text{Yb}_{0.03}\text{O}_2$

| Peak position | FWHM (nm)  | Normalized Intensity |
|---------------|------------|----------------------|
| 957,867±0,04  | 8,80±0,14  | 0,14                 |
| 966,71±0,02   | 2,86±0,04  | 0,22                 |
| 972,42±0,01   | 2,25±0,02  | 0,51                 |
| 974,21±0,026  | 9,13±0,06  | 0,48                 |
| 983,92±0,06   | 4,67±0,19  | 0,09                 |
| 990,53±0,27   | 11,16±0,61 | 0,07                 |
| 998,67±0,44   | 52,60±0,66 | 0,13                 |
| 1030,19±0,26  | 8,51±0,70  | 0,027                |
| 1040,11±0,18  | 6,61±0,39  | 0,04                 |

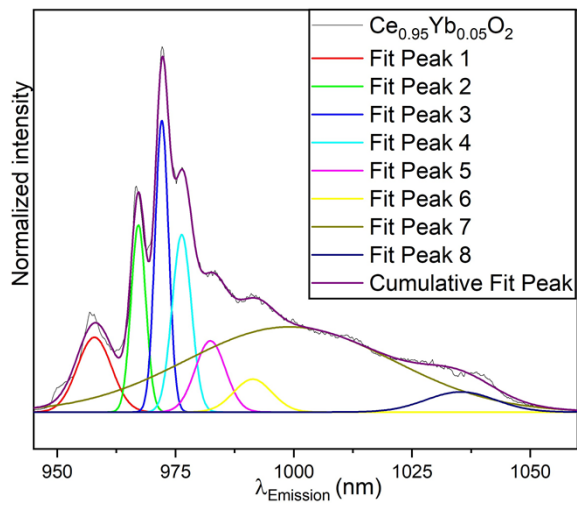

**Fig. S15** Gauss fit for  $\text{Ce}_{0.95}\text{Yb}_{0.05}\text{O}_2$

**Table S13** Parameters from the Gauss fit for  $\text{Ce}_{0.95}\text{Yb}_{0.05}\text{O}_2$

| Peak position | FWHM (nm)  | Normalized intensity |
|---------------|------------|----------------------|
| 957,86±0,05   | 8,51±0,17  | 0,20                 |
| 967,165±0,02  | 3,67±0,04  | 0,51                 |
| 972,11±0,02   | 3,371±0,05 | 0,80±0,01            |
| 976,32±0,05   | 4,77±0,19  | 0,49±0,02            |
| 982,37±0,19   | 7,52±0,74  | 0,19±0,01            |
| 991,34±0,51   | 9,50±0,95  | 0,09±0,01            |
| 999,10±0,52   | 51,55±0,89 | 0,23                 |
| 1035,30±0,26  | 17,29±0,92 | 0,05                 |
